# Supplementary material
Source: PubMed Central journal article supplement (PMC3438889)
Supplement: NIHMS400045-supplement-05.pdf [file NIHMS400045-supplement-05.pdf]

Table S5. Publicly Available Gene Expression Datasets from Breast, Colon and Lung Carcinomas with Follow-Up Clinical Data Used for This Study (Supplement for Figures 6 and 7)

| Dataset   | Outcome Event    | n=? | Events | ER+ (n=?) | ER- (n=?) | % ER Neg | Other Info           | GEO      | Reference                                                               |
|-----------|------------------|-----|--------|-----------|-----------|----------|----------------------|----------|-------------------------------------------------------------------------|
| Breast_1  | Overall Survival | 159 | 46     | 130       | 29        | 18%      | x                    | GSE1456  | (Pawitan et al., 2005)                                                  |
| Breast_2  | 5Y Met           | 295 | 78     | 226       | 69        | 23%      | x                    | X        | (van de Vijver et al., 2002)                                            |
| Breast_3  | Relapse          | 286 | 107    | 209       | 77        | 27%      | x                    | GSE2034  | (Wang et al., 2005)                                                     |
| Breast_4  | 5Y Status        | 102 | 42     | 68        | 34        | 33%      | x                    | GSE3143  | (Bild et al., 2006)                                                     |
| Breast_5  | 3Y Survival      | 108 | 15     | 75        | 30        | 28%      | x                    | X        | <a href="http://cancergenome.nih.gov/">http://cancergenome.nih.gov/</a> |
| Breast_6  | 5Y Met           | 200 | 28     | 156       | 44        | 22%      | x                    | GSE11121 | (Schmidt et al., 2008)                                                  |
| Breast_7  | Overall Met      | 88  | 28     | 88        | 0         | 0%       | x                    | GSE6532  | (Loi et al., 2007)                                                      |
| Breast_8  | 5Y Met           | 77  | 6      | 77        | 0         | 0%       | x                    | GSE9195  | (Loi et al., 2008)                                                      |
| Breast_9  | 5Y Met           | 198 | 35     | 134       | 64        | 32%      | x                    | GSE7390  | (Desmedt et al., 2007)                                                  |
| Breast_10 | 3Y Met           | 81  | 12     | 45        | 36        | 44%      | x                    | GSE2603  | (Minn et al., 2005)                                                     |
| Lung_1    | 3Y Survival      | 50  | 27     | NA        | NA        | NA       | Lung Adeno-carcinoma | GSE3141  | (Bild et al., 2006)                                                     |
| Lung_2    | 3Y Survival      | 37  | 9      | NA        | NA        | NA       | Lung Adeno-carcinoma | GSE19188 | (Hou et al., 2010)                                                      |
| Colon_1   | 5Y Relapse       | 95  | 58     | NA        | NA        | NA       | x                    | GSE14333 | (Jorissen et al., 2009)                                                 |
| Colon_2   | 5Y Survival      | 119 | 67     | NA        | NA        | NA       | x                    | GSE17538 | (Smith et al., 2010)                                                    |

Table S6. Multivariate Analysis of Breast Cancer-Specific Mortality by HSF1-Status (HSF1 High Positive or Low Positive versus HSF1-Negative, Supplement for Figure 6D).

| Models                            | N     |           | Hazard Ratio (95% CI) |                  |                  |
|-----------------------------------|-------|-----------|-----------------------|------------------|------------------|
|                                   | Cases | Endpoints | None                  | Low              | High             |
| ER-positive, node negative cases: |       |           |                       |                  |                  |
| Model <sup>1</sup>                | 947   | 142       | 1.00                  | 1.65 (1.02-2.66) | 2.41 (1.45-3.99) |
| Model <sup>2</sup>                | 947   | 142       | 1.00                  | 1.42 (0.88-2.31) | 1.98 (1.17-3.33) |

\*CI denotes confidence interval.

Model<sup>1</sup>: Adjust for age at diagnosis (years).

Model<sup>2</sup>: Adjust for age at diagnosis (years), date of diagnosis (months), disease stage (I, II, III), grade (I, II, III), radiation treatment (yes, no, missing), chemotherapy and hormonal treatment (no/no, yes/no, no/yes, yes/yes, missing).

**Table S7.** Oligonucleotides Used in this Study

| <b>NAME</b>         | <b>SEQUENCE</b>        |
|---------------------|------------------------|
| AANAT/Ube2O-qPCR-F  | GAGCCGTAGGTCCCTTCTTT   |
| AANAT/Ube2O-qPCR-R  | CTCAGGAACCTTCCAGACCA   |
| CKS2-qPCR-F         | ACCGACTACGTCATCACCAA   |
| CKS2-qPCR-R         | GTGGAAAGTTCCAGGACACG   |
| Jarid2-qPCR-F       | TTGGTTGCGCTTTTAGCTTT   |
| Jarid2-qPCR-R       | ACCCCAAGTCACAGAGATGG   |
| Maf1/Sharpin-qPCR-F | TTTGCCACAAATGGACAC     |
| Maf1/Sharpin-qPCR-R | CCCAAAGACCAGCTCTAACG   |
| Pgk1-qPCR-F         | TCTCGCACATTCTTCACGTC   |
| Pgk1-qPCR-R         | AGGAACCTTCCCAGACTTAGG  |
| RBM23-qPCR-F        | TTGGGGTTTCTCACCAGTTC   |
| RBM23-qPCR-R        | CTGCAGTGCTGCTTTTCTTG   |
| HspA6-qPCR-F        | GATCTGCCCGAACCTTCTC    |
| HspA6-qPCR-R        | AACTTTCGCGAACCTTTCC    |
| HspA8-qPCR-F        | CCACCCTGCCTCTTATACCC   |
| HspA8-qPCR-R        | GGCTTGTGATTGGGTCTTGT   |
| HSPD1-qPCR-F        | CGGCCGGCTTAGTCTAGTT    |
| HSPD1-qPCR-R        | ATTTGACCCTTGAGCCGTAG   |
| BCL10-qPCR-F        | TGAGTCATATGGGTGTGCTG   |
| BCL10-qPCR-R        | TCCCCTTAGCACAGAAGTGA   |
| Ncor2-qPCR-F        | GGGTGGAATTACAGCCTCAG   |
| Ncor2-qPCR-R        | TCCTGTAGCTCCCACACCTC   |
| DHFR1-qPCR-F        | ACCTGGTCGGCTGCACCT     |
| DHFR1-qPCR-R        | TTGCCCTGCCATGTCTCG     |
| Intergenic-qPCR-F   | ATGTCAGGCCCATGAACGAT   |
| Intergenic-qPCR-R   | GCATTCATGGAGTCCAGGCTTT |
